# Supplementary material
Source: Springer Nature journal article supplement (https://www.springermedizin.de/resource/supplementary/13075_2012_4013_MOESM9_ESM.pdf/9695840)

control (complete medium)

differentiation medium

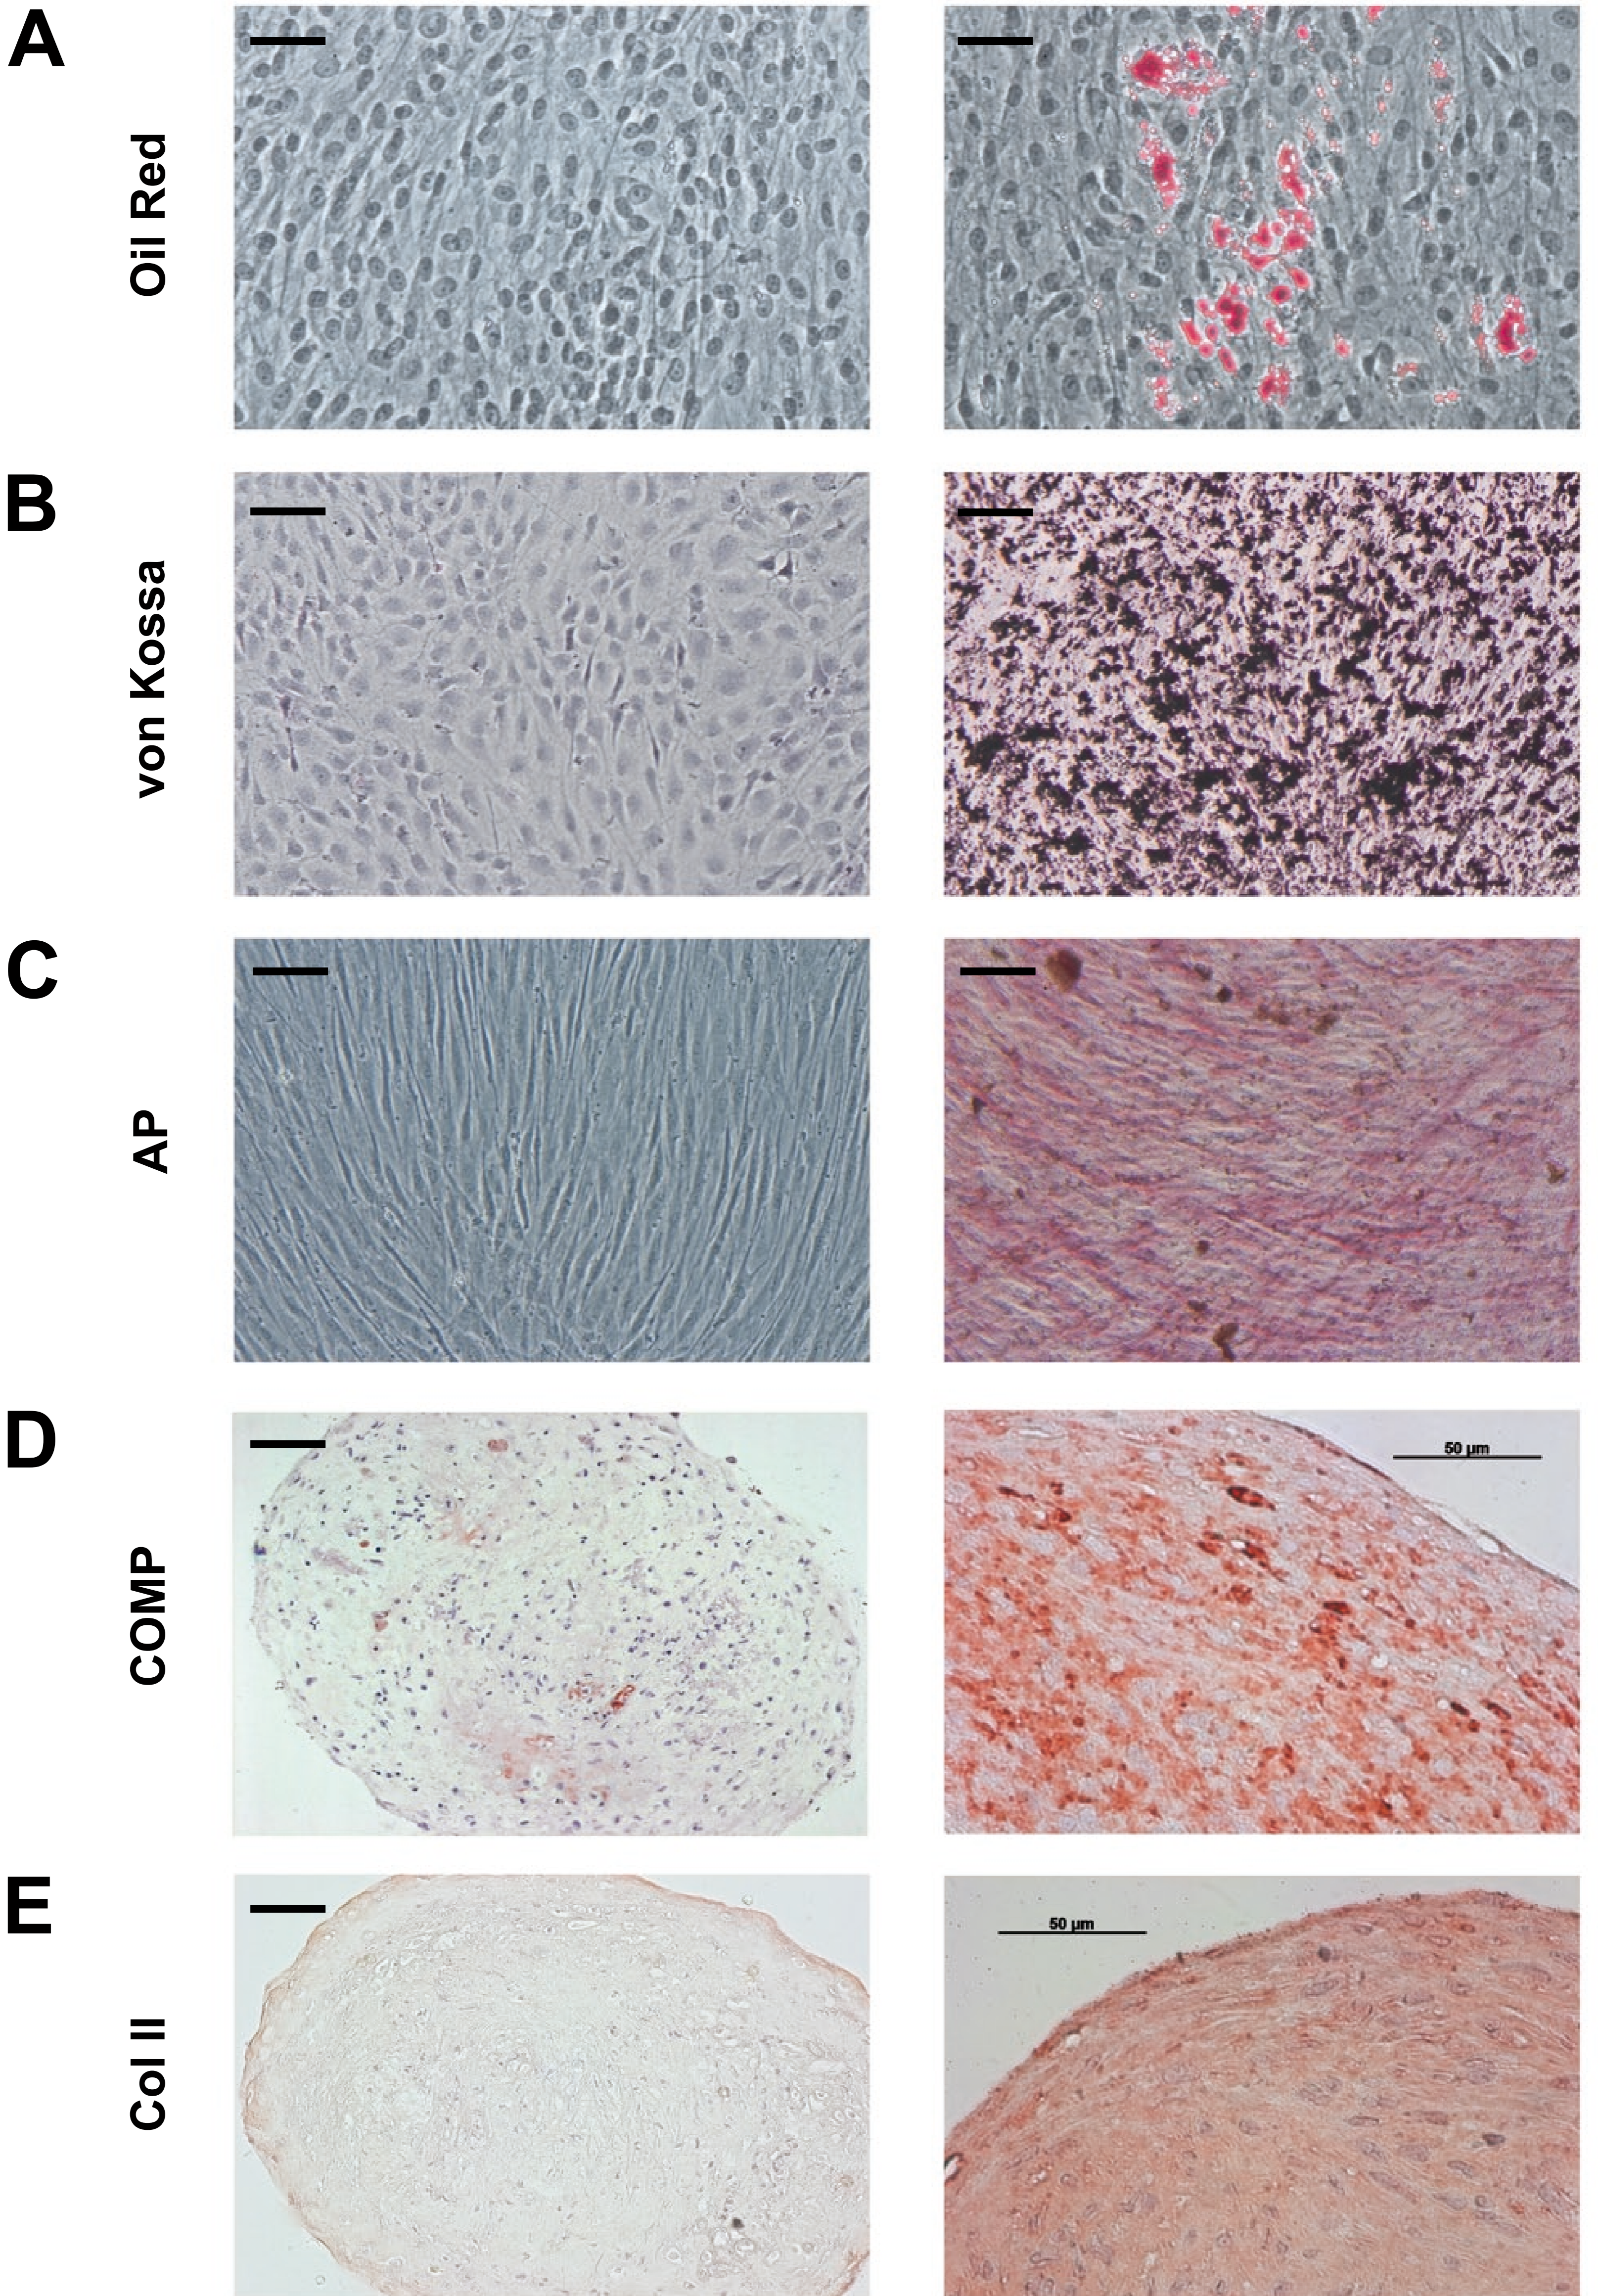

Supplement: MOESM9 [file 9695840]
